# Supplementary material for: Incidence and risk factors for respiratory tract bacterial colonization and infection in lung transplant recipients
Source: Springer Nature journal article supplement (doi:10.1007/s10096-021-04153-1), 2021-01-21
Supplement: MOESM1 [file 18787110]

**Supplementary Table 1.** Risk factors for bacterial respiratory colonization 30-days after LT. Comparison between Not colonized, colonized by susceptible strains (SS) or by MDR bacteria.

| Risk factors                                                    | No 30 days<br>colonization<br>N=63 (%) | 30 days SS<br>colonization<br>N=21 (%) | 30 days MDR<br>colonization<br>N=10 (%) | <i>p-value</i> |
|-----------------------------------------------------------------|----------------------------------------|----------------------------------------|-----------------------------------------|----------------|
| Males                                                           | 38 (60.3)                              | 14 (66.7)                              | 7 (70)                                  | 0.770          |
| Median age (IQR)                                                | 58 (52-62)                             | 53 (48-56.5)                           | 59 (54.8-64.3)                          | <b>0.031</b>   |
| Pre-LT BMI                                                      | 24 (20-28)                             | 24 (20-29.1)                           | 25.4 (20-30.5)                          | 0.680          |
| <b>Indication for transplant:</b>                               |                                        |                                        |                                         |                |
| - IPF                                                           | 26 (41.3)                              | 7 (33.3)                               | 8 (80)                                  | 0.156          |
| - COPD                                                          | 16 (25.4)                              | 7 (33.3)                               | 1 (10)                                  |                |
| - Other                                                         | 21 (33.3)                              | 7 (33.3)                               | 1 (10)                                  |                |
| <b>Type of transplant:</b>                                      |                                        |                                        |                                         |                |
| - Single                                                        | 40 (63.5)                              | 5 (23.8)                               | 7 (70)                                  | 0.004          |
| - Double                                                        | 23 (36.5)                              | 16 (76.2)                              | 3 (30)                                  |                |
| <b>Comorbidities :</b>                                          |                                        |                                        |                                         |                |
| - Osteoporosis/osteopenia                                       | 52 (82.5)                              | 18 (85.7)                              | 8 (80)                                  | 0.913          |
| - Peptic disease                                                | 30 (47.6)                              | 13 (61.9)                              | 5 (50)                                  | 0.524          |
| - Chronic coronary heart disease                                | 5 (7.9)                                | 2 (9.5)                                | 4 (40)                                  | <b>0.013</b>   |
| - Diabetes                                                      | 3 (4.8)                                | 4 (19)                                 | 2 (20)                                  | 0.077          |
| - Obesity                                                       | 16 (25.4)                              | 4 (19)                                 | 3 (30)                                  | 0.768          |
| - Nephropathy                                                   | 12 (19)                                | 4 (19)                                 | 4 (40)                                  | 0.310          |
|                                                                 | 2 (3.2)                                | 1 (4.8)                                | 0 (0)                                   | 0.780          |
| Hospitalization 90 days before LT                               | 14/59 (23.7)                           | 4 (19)                                 | 2/10 (20)                               | 0.683          |
| ICU admission 90 days before LT                                 | 3/57 (5.3)                             | 1/20 (5)                               | 0/9 (0)                                 | 0.913          |
| Antibiotic treatment 90 days before LT                          | 14/56 (25)                             | 2/20 (10)                              | 1 (10)                                  | 0.319          |
| <b>Baseline respiratory bacterial colonization (recipient):</b> |                                        |                                        |                                         |                |
| - Overall                                                       | 9 (14.3)                               | 3 (14.3)                               | 1 (10)                                  | 0.933          |
| - MDR bacteria                                                  | 2/61 (3.3)                             | 0/20 (0)                               | 0/9 (0)                                 | 0.742          |
| <b>Baseline respiratory bacterial infection (recipient):</b>    |                                        |                                        |                                         |                |
| - Overall                                                       | 4/59 (6.7)                             | 1 (4.8)                                | 1 (10)                                  | 0.668          |
| - MDR bacteria                                                  | 1/59 (1.7)                             | 0 (0)                                  | 0/9 (0)                                 | 0.687          |
| <b>Baseline respiratory bacterial colonization (donor):</b>     |                                        |                                        |                                         |                |
| - Overall                                                       | 12 (19)                                | 8 (38.1)                               | 3/8 (37.5)                              | 0.418          |
| - MDR bacteria                                                  | 1/50 (1.9)                             | 1/18 (5.5)                             | 0/8 (0)                                 | 0.876          |
| <b>Baseline respiratory bacterial infection (donor):</b>        |                                        |                                        |                                         |                |
| - Overall                                                       | 6/54 (11.1)                            | 0/19 (0)                               | 0/8 (0)                                 | 0.198          |
| - MDR bacteria                                                  | 0/50 (0)                               | 0 (0)                                  | 0/8 (0)                                 | 0.512          |
| <b>Post LT systemic antibiotic prophylaxis</b>                  |                                        |                                        |                                         |                |
| - Standard <sup>a</sup>                                         | 55 (87.3)                              | 16 (76.2)                              | 7 (70)                                  | 0.258          |
| - Atypical                                                      | 8 (12.7)                               | 5 (23.8)                               | 3 (30)                                  |                |
| Basiliximab induction                                           | 20 (31.7)                              | 11 (52.4)                              | 3 (30)                                  | 0.21           |
| <b>Immunosuppressive regimen:</b>                               |                                        |                                        |                                         |                |
| -Tacrolimus                                                     | 18/55 (32.7)                           | 8/19 (42.1)                            | 3/9 (33.3)                              | 0.83           |
| -Cyclosporine                                                   | 35/55 (63.6)                           | 11/19 (57.9)                           | 6/9 (66.7)                              |                |
| -Other                                                          | 2/55 (3.6)                             | 0/19 (0)                               | 0/9 (0)                                 |                |
| Aerosol prophylaxis, length of days median (IQR)                | 55 (87.3)                              | 17 (81)                                | 10 (100)                                | 0.332          |
|                                                                 | 29 (21-44)                             | 29 (22-40)                             | 17 (6.5-31.5)                           | 0.071          |

|                                          |            |            |                |       |
|------------------------------------------|------------|------------|----------------|-------|
| <b>Rejection</b>                         | 17 (27)    | 6 (28.6)   | 3 (30)         | 0.975 |
| <b>Days from LT, median (IQR)</b>        | 22 (17-37) | 24 (12-31) | 43 (20-50)     | 0.493 |
| <b>PGD</b>                               | 43 (69.4)  | 14 (66.7)  | 7 (70)         | 0.970 |
| <b>Length of stay, days median (IQR)</b> | 37 (29-66) | 34 (28-61) | 36.5 (28-61.3) | 0.666 |

BMI body mass index; IPF Idiopathic pulmonary fibrosis; COPD chronic obstructive pulmonary disease; LT lung transplant; MDR multi-drug resistant; PGD Primary Graft Dysfunction; <sup>a</sup> Comprehending one of each of the following classes: anti-pseudomonal cephalosporin (namely ceftazidime), anti Gram positive drug (namely vancomycin), antifungal prophylaxis (voriconazole) and trimethoprim-sulfamethoxazole
